**Title: Analysis of Pleiotropy for Testosterone and Lipid Profiles in Males and Females**

**Authors: Srijan Chattopadhyay  
Swapnaneel Bhattacharyya  
Sevantee Basu**

The authors have withdrawn this manuscript owing to the work having been performed in the lab of Anasuya Chakrabarty, but the manuscript being submitted without her knowledge or consent. Therefore, the authors do not wish this work to be cited as reference for the project. If you have any questions, please contact the corresponding author.
